# Supplementary material
Source: ML conference proceedings conference paper supplement (https://proceedings.mlr.press/v32/du14.html)
Supplement: Supplementary file 1 [file du14-supp.zip]

Archive with 3 entries (2 files):
- appendix1358.pdf
- __MACOSX/
- __MACOSX/._appendix1358.pdf
